# Supplementary material
Source: publisher site journal article supplement (https://www.spandidos-publications.com/4002/downloadSupplementary)

Figure S1. Preliminary tests of inhibitors on the regulation of hypoxia-induced ANP secretion in isolated beating rat atria (n=3). GLX1, IC<sub>50</sub> dose of GLX351322 (5  $\mu$ M); GLX2, effective dose of GLX351322 (35  $\mu$ M); EX1, IC<sub>50</sub> dose of EX3527 (123 nM); EX2, effective dose of EX527 (0.25  $\mu$ M); ML1, IC<sub>50</sub> dose of ML385 (1.9  $\mu$ M); ML2, effective dose of ML385 (10  $\mu$ M). \*\*\*P<0.001 vs. control; #P<0.05, ###P<0.001 vs. Hy. Hy, hypoxia.

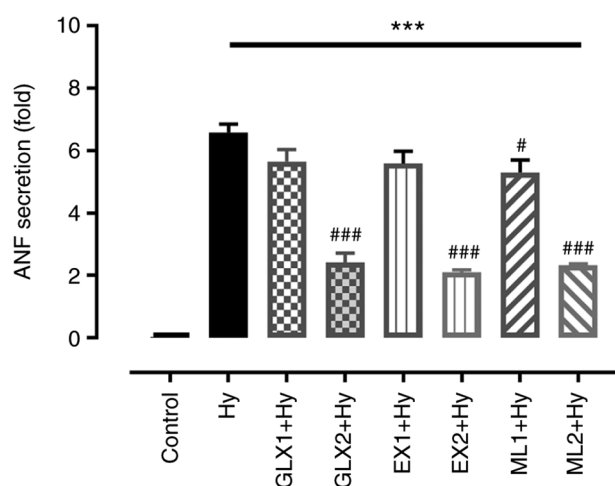

Supplement: Supplementary file 1 [file downloadSupplementary]
